# Supplementary figures and images for: High Expression of UPK3A Promotes the Progression of Gastric Cancer Cells by Inactivating p53 Pathway
Source: Hindawi journal article supplement (doi:10.1155/2022/6897561), 2022-06-21

# UPK3A expression

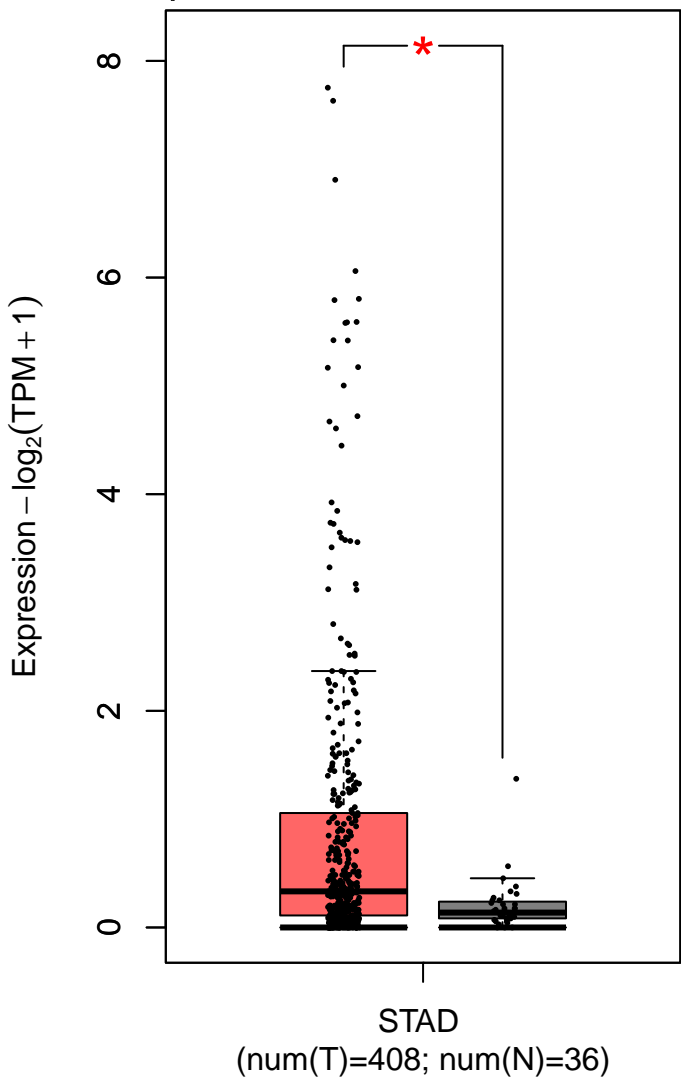

Supplement: f1 [file 6897561.f1.zip]

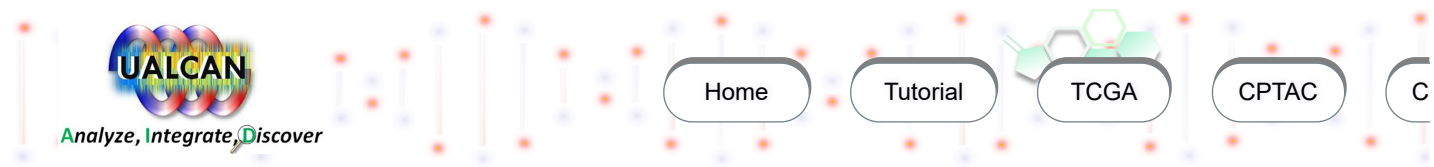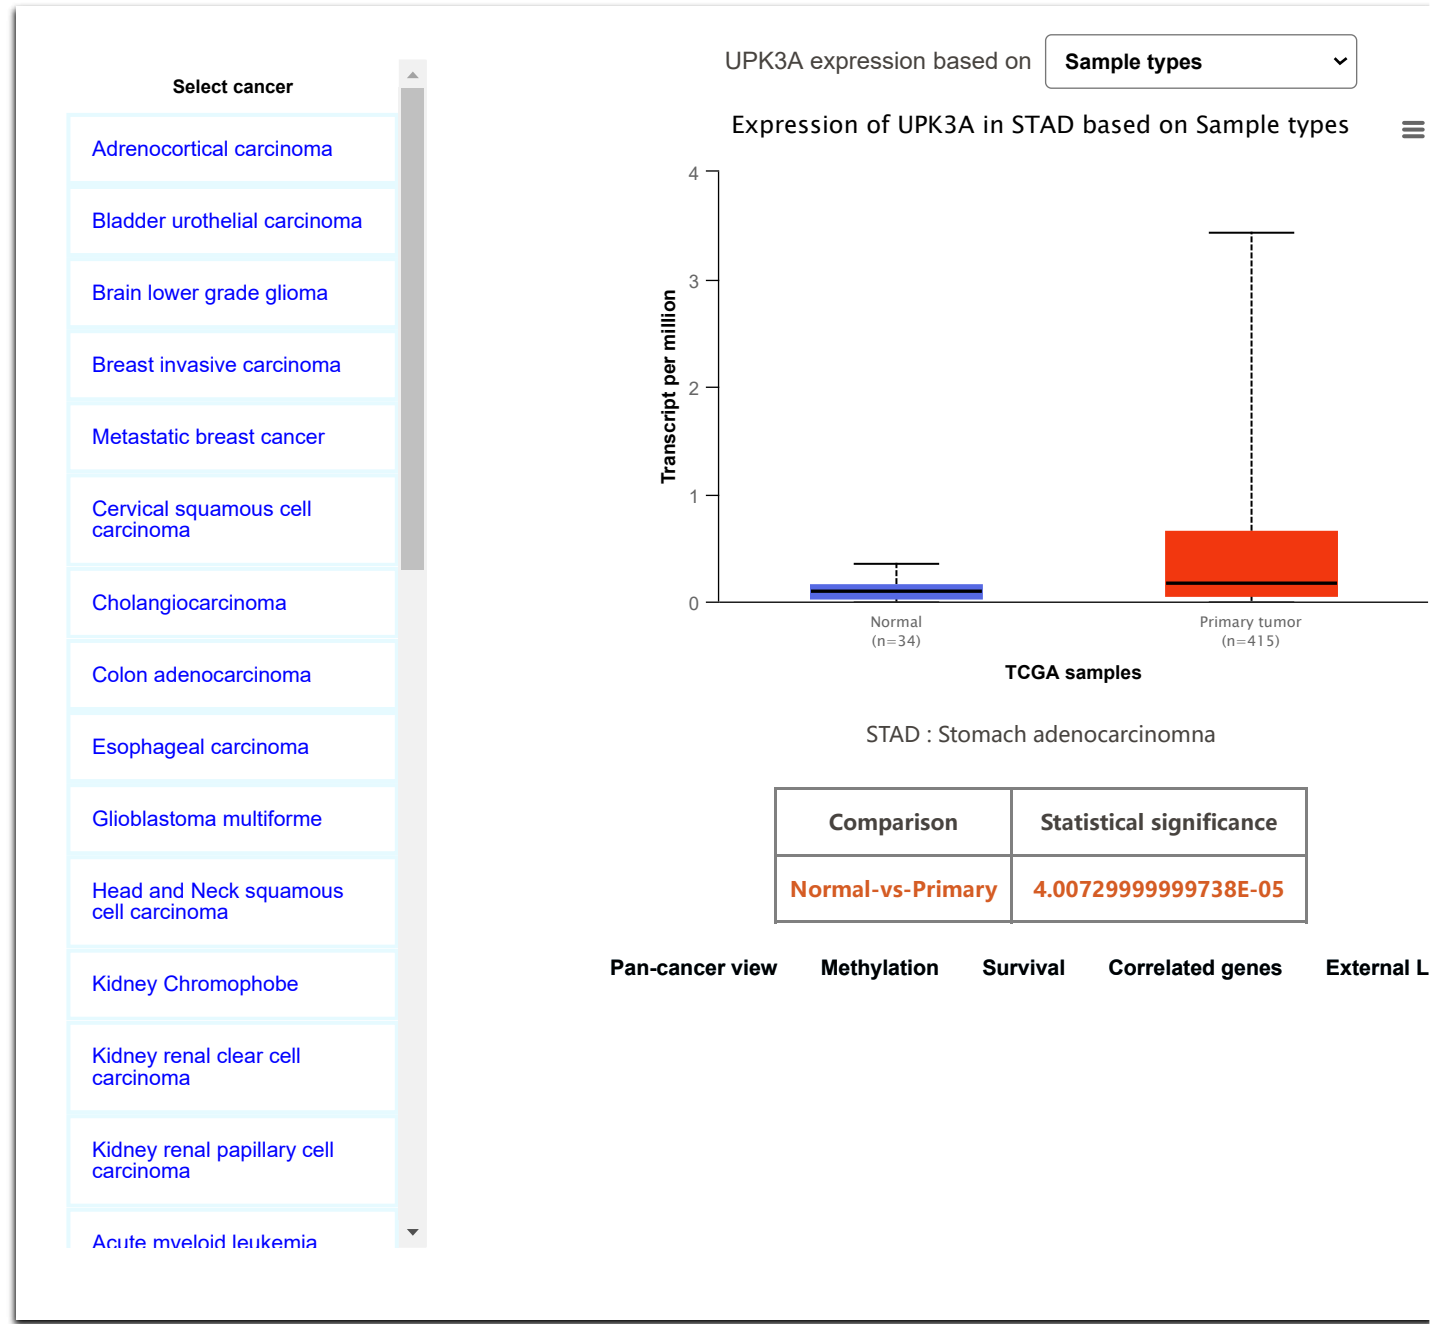

Supplement: f1 [file 6897561.f1.zip]
